# Supplementary material
Source: HighWire-hosted journal article supplement (https://lupus.bmj.com/content/suppl/2022/09/30/9.1.e000739)
Supplement: lupus-2022-000739supp001_data_supplement.pdf [file lupus-2022-000739supp001_data_supplement.pdf]

**Table S1. Subject demographics and baseline characteristics**

| Category                | Features                      | SLE patients<br>(n = 31) | Healthy subjects<br>(n = 21) |
|-------------------------|-------------------------------|--------------------------|------------------------------|
| Demographic             | Age, year (mean ± SD)         | 33.52 ± 13.79            | 25.12 ± 1.81                 |
|                         | Gender, male, n (%)           | 3/31 (9.68%)             | 4/21 (19.05%)                |
|                         | Female, n (%)                 | 28/31 (90.32%)           | 17/21 (80.95%)               |
|                         | Race, n (%)                   |                          |                              |
|                         | Asian                         | 31/31 (100%)             | 21/21 (100%)                 |
|                         | African American              | 0 (0%)                   | 0 (0%)                       |
|                         | Unknown/Other                 | 0 (0%)                   | 0 (0%)                       |
| Laboratory parameters   | SLEDAI-2K (mean ± SD)         | 5.93 ± 3.98              | ND                           |
|                         | Anti-dsDNA positive No (%)    | 21/31 (67.74%)           | ND                           |
|                         | C3 levels, mg/L (#)           | 905 (625-1300)           | ND                           |
|                         | C4 levels, mg/L (#)           | 150 (50-360)             | ND                           |
|                         | ESR, mm/h (#)                 | 60 (22.5-72.5)           | ND                           |
| Clinical manifestations | Nephritis, n (%)              | 12/31 (38.71%)           | ND                           |
|                         | Vasculitis, n (%)             | 3/31 (9.68%)             | ND                           |
|                         | Malar rash, n (%)             | 2/31 (6.45%)             | ND                           |
|                         | Discoid rash, n (%)           | 1/31 (3.22%)             | ND                           |
|                         | Purtscher retinopathy, n (%)  | 2/31 (6.45%)             | ND                           |
|                         | Organic brain syndrome, n (%) | 2/31 (6.45%)             | ND                           |
|                         | Low complement level n, (%)   | 9/31 (29.03%)            | ND                           |
|                         | Increased DNA binding n, (%)  | 10/31 (32.26%)           | ND                           |
| Treatment               | Prednisolone, n (%)           | 28/31 (90.32%)           | ND                           |
|                         | Antimalarial, n (%)           | 25/31 (80.64%)           | ND                           |
|                         | Cyclophosphamide, n (%)       | 16/31 (51.61%)           | ND                           |
|                         | Azathioprine, n (%)           | 6/31 (19.35%)            | ND                           |
|                         | Mycophenolate, n (%)          | 14/31 (45.16%)           | ND                           |
|                         | Triamcinolone, n (%)          | 4/31 (12.90%)            | ND                           |
|                         | Methotrexate, n (%)           | 2/31 (6.45%)             | ND                           |

ND: Not done; SLEDAI-2K: Systemic Lupus Erythematosus Disease Activity Index 2000; Anti-dsDNA: Anti-double strand DNA; C3: Complement 3; C4: Complement 4; ESR: Erythrocyte Sedimentation Rate. # = Median (Interquartile range)

**Table S2. Flow cytometry panel used for this study**

|           | <b>Marker</b>                                     | <b>Fluorochrome</b> | <b>Clone</b> | <b>Catalog Number</b> | <b>Company</b> |
|-----------|---------------------------------------------------|---------------------|--------------|-----------------------|----------------|
| <b>1</b>  | CD19                                              | FITC                | HIB19        | 302206                | BioLegend      |
| <b>2</b>  | CD20                                              | APC/Cy7             | 2H7          | 302313                | BioLegend      |
| <b>3</b>  | CD21                                              | APC                 | Bu32         | 354906                | BioLegend      |
| <b>4</b>  | CD27                                              | PE                  | M-T271       | 356406                | BioLegend      |
| <b>5</b>  | CD27                                              | APC/fire            | M-T271       | 356428                | BioLegend      |
| <b>6</b>  | CD38                                              | AF700               | HB-7         | 356624                | BioLegend      |
| <b>7</b>  | IgD                                               | PE/Dazzle           | IA6-2        | 348240                | BioLegend      |
| <b>8</b>  | IgD                                               | PE/Cy7              | IA6-2        | 348210                | BioLegend      |
| <b>9</b>  | IgG                                               | PerCP cy5.5         | M1310G05     | 410710                | BioLegend      |
| <b>10</b> | CD11c                                             | AF700               | Bu15         | 337220                | BioLegend      |
| <b>11</b> | CD86                                              | PE/Cy5              | IT2.2        | 305408                | BioLegend      |
| <b>12</b> | CD40                                              | PE/Cy5              | 5C3          | 334314                | BioLegend      |
| <b>13</b> | HLA-DR                                            | APC                 | G-46-6       | 559866                | BD Pharmingen  |
| <b>14</b> | IL-21R                                            | PE/Cy7              | 17A12        | 359514                | BioLegend      |
| <b>15</b> | FcRL4                                             | PE                  | 413D12       | 340204                | BioLegend      |
| <b>16</b> | FcRL5                                             | PE                  | 509f6        | 340304                | BioLegend      |
| <b>17</b> | CXCR5                                             | AF700               | J252D4       | 356916                | BioLegend      |
| <b>18</b> | CCR7                                              | PE                  | G043H7       | 353204                | BioLegend      |
| <b>19</b> | pSyK (Y352)                                       | PE/Cy7              | 17A/P-ZAP70  | 561458                | BD Bioscience  |
| <b>20</b> | pBLNK (Y84)                                       | AF647               | J117-1278    | 558443                | BD Bioscience  |
| <b>21</b> | pPLC $\gamma$ 2 (Y759)                            | PE                  | K-86-689.37  | 558490                | BD Bioscience  |
| <b>22</b> | Zombie Red <sup>TM</sup><br>Fixable Viability Kit | -                   | -            | 423109                | BioLegend      |

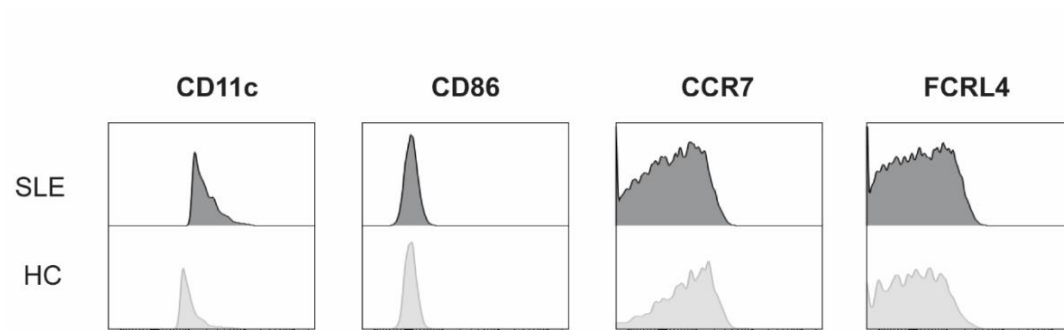

**Figure S1. The aNAV B cells of SLE patients exhibited T cell costimulatory phenotype**  
Representative histograms of CD11c, CD86, CCR7 and FCRL4 expression on aNAV B cells of SLE patients (shaded black area) and HCs (shaded grey area).

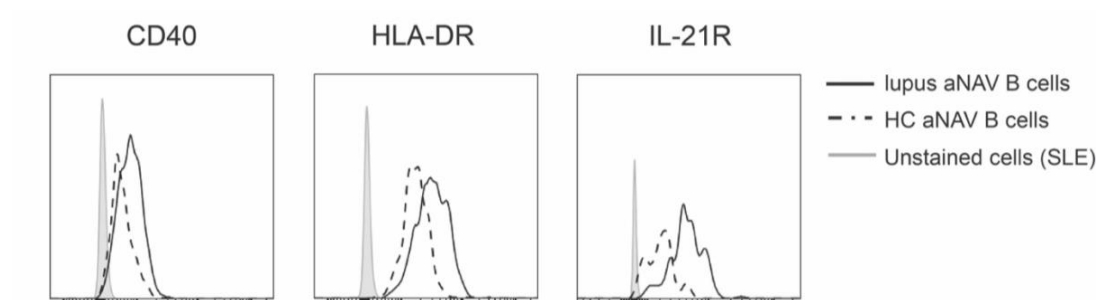

**Figure S2. The *ex vivo* flow cytometric analysis of CD40, HLA-DR and IL-21R expression on aNAV B cells**

Representative histogram overlays denoted an expression of CD40, HLA-DR and IL-21 on aNAV B cells from SLE (black solid line) and HC (black dash line) compared with unstained control (shaded plot).

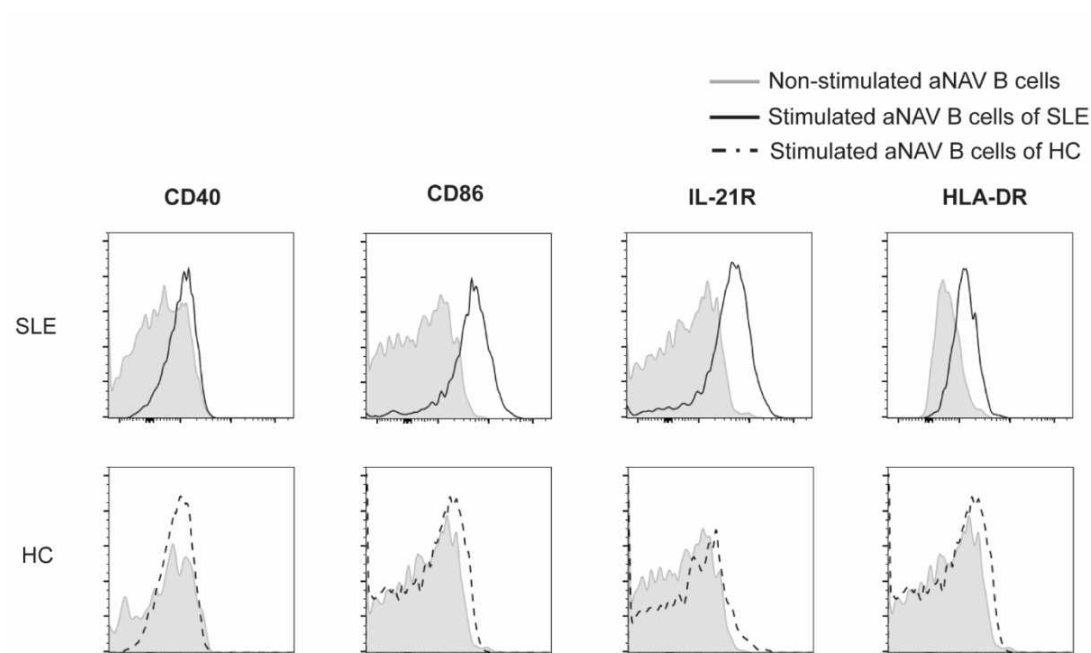

**Figure S3. The lupus aNAV B cells had upregulated T cell costimulatory molecules after receiving BCR and TLR7/8 signaling *in vitro* cultures**

Representative histogram overlays for CD40, CD86, IL-21R and HLA-DR expression on aNAV B cells from SLE patients (black solid line) and HC (black dash line) after stimulation with R848, IL-2 and autoantigen compared to non-stimulated aNAV B cells (shaded grey area).
